# Supplementary material
Source: publisher site journal article supplement (https://www.dovepress.com/article/552197)
Supplement: Supplementary file 1 [file 552197%20Revised%20appendix.pdf]

## Appendix 1

### DUPILUMAB-ASSOCIATED OCULAR SURFACE DISEASE: ACTIVITY ASSESSMENT QUESTIONNAIRE

#### Part I: Information regarding current treatment with Dupilumab

1. Are you currently undergoing treatment with Dupilumab?  
 Yes  No
2. What was the medical reason for initiating treatment with Dupilumab?  
 Atopic Dermatitis  Asthma  Rhinosinusitis  Eosinophilic Esophagitis  Nodular Prurigo

#### Part II: Ocular symptoms information

1. Were any symptoms present before Dupilumab treatment?  
 Yes  No
  - 1.1 If yes, how did those symptoms evolve during Dupilumab treatment?  
 Increased  Decreased  Remained the same
2. In the last 7 days, have you experienced any ocular symptoms?  
 Yes  No
3. Stinging sensation and/or dry eye sensation in one or both eyes?  
 Yes  No
4. Redness in one or both eyes?  
 Yes  No
5. Itching in one or both eyes?  
 Yes  No
6. Discharge in one or both eyes?  
 Yes  No
7. Change in vision (such as blurring or reduced vision) in one or both eyes?  
 Yes  No
8. Sensitivity to light in one or both eyes?  
 Yes  No

#### Part III: Symptoms impact in daily life

1. From 0 to 10, how would you rate your eye discomfort in your daily life? (0= not bothersome at all; 10 = extremely bothersome - as bad as it can get) \_\_\_\_\_

#### Part IV: Study participation

1. In case you meet the criteria for the second part of the study, would you be available for an ophthalmology assessment?  
 Yes  No

## **Score Sheet**

Answering “no” to the first question in Part I of the questionnaire will result in exclusion from the study.

Answering “no” to the question in Part IV of the questionnaire will result in exclusion from the study.

Based on the answers obtained in Part II and III of the questionnaire, only patients who meet one of the following criteria will be selected:

### Cases (Group A):

- Three or more symptoms, regardless of their impact on the patient's daily life.
- One or more symptoms, with a rating of five or higher assigned to the impact on the patient's daily life.

### Controls (Group B):

- Fewer than three ocular symptoms and no impact on daily life (severity score of zero).

**Appendix 1.** Questionnaire adapted from the DAOSD Activity Assessment Questionnaire who was administered *via* telephone to select patients for a noninvasive ocular surface evaluation based on predefined inclusion and exclusion criteria.

## Appendix 2

### DUPIUMAB-ASSOCIATED OCULAR SURFACE DISEASE

Informed consent date: \_\_/\_\_/\_\_

#### Part I: General patient information

1. Age \_\_\_\_\_
2. Sex  
 Feminine  Masculine

#### Part II: Clinical patient information

3. What was the medical reason for initiating treatment with Dupilumab?  
 Atopic Dermatitis  Asthma  Rhinosinusitis  Eosinophilic Esophagitis  Nodular Prurigo
4. How old were you when you received the diagnosis mentioned in the previous question?  
 0-10 years old  10-20 years old  20-30 years old  30-40 years old  40-50 years old  more than 50 years old
5. How long have you been undergoing treatment with Dupilumab?  
 0-2 months  2-4 months  4-6 months  6-8 months  10-12 months  more than 12 months
6. Do you have any other diseases?  
 Yes  No  
6.1 If yes, which one(s)? \_\_\_\_\_
7. Do you have any ophthalmological disease?  
 Yes  No  
7.1 If yes, which one(s)? \_\_\_\_\_
8. Have you ever undergone ophthalmological treatment?  
 Yes  No  
8.1 If yes, what was the reason? \_\_\_\_\_  
8.2 If yes, what treatment did you undergo? \_\_\_\_\_  
8.3 If yes, how long did the treatment last? \_\_\_\_\_
9. After starting treatment with Dupilumab, have you ever sought medical services due to ocular symptoms?  
 Yes  No  
9.1 If yes, how long has passed between the start of treatment and the appearance of the first symptoms?  
 1-2 weeks  2-4 weeks  1-3 months  3-6 months  6-12 months  1-3 years  more than 3 years  
9.2 If yes, did you need ophthalmological treatment?  
 Yes  No  
9.2.1 If yes, did the symptoms subside after the recommended treatment?  
 Yes  No

**Appendix 2.** Questionnaire on Dupilumab-treatment, past or current ophthalmological conditions, use of ophthalmic medication.
